# Supplementary material for: Barnacle analysis as a microplastic pollution bioindicator on the East Coast of Surabaya
Source: PeerJ. 2024 Jun 24;12:e17548. doi: 10.7717/peerj.17548 (PMC11210488; doi:10.7717/peerj.17548)
Supplement: Data S1 — The raw data shows all barnacle morphometry results, visual and chemical microplastic observation data. [file peerj-12-17548-s001.xlsx]

## Sheet: Overall Data Visual MPs
Size	Shape	Color	Sample
63.55	Fiber	blue	barnacle
161.94	Fiber	blue	barnacle
82	Fiber	blue	barnacle
15.59	Fiber	blue	barnacle
21.43	Fiber	blue	barnacle
58.37	Fiber	blue	barnacle
37.55	Fiber	blue	barnacle
157.5	Fiber	blue	barnacle
143.09	Fiber	red	barnacle
15.03	Fiber	blue	barnacle
12.27	Fiber	blue	barnacle
4.51	Fiber	blue	barnacle
5.14	Fragmen	blue	barnacle
10.63	Fragmen	black	barnacle
5.47	Fragmen	blue	barnacle
2.49	Fragmen	blue	barnacle
3.75	Fragmen	blue	barnacle
3.65	Fragmen	blue	barnacle
4.17	Fragmen	blue	barnacle
9.92	Fragmen	black	barnacle
3.13	Fragmen	blue	barnacle
17.37	Fragmen	brown	barnacle
33.14	Fragmen	black	barnacle
102.86	Fiber	blue	barnacle
57.93	Fiber	blue	barnacle
20.39	Fiber	blue	barnacle
7.85	Fiber	blue	barnacle
76.14	Fiber	red	barnacle
279.14	Fiber	black	barnacle
58.88	Fiber	black	barnacle
7.25	Fragmen	blue	barnacle
3.42	Fragmen	blue	barnacle
27	Fragmen	red	barnacle
7.77	Fragmen	blue	barnacle
6.63	Fragmen	red	barnacle
18.44	Fragmen	brown	barnacle
21.29	Fragmen	black	barnacle
10.34	Fragmen	blue	barnacle
8.83	Fragmen	blue	barnacle
7.03	Fragmen	blue	barnacle
6.03	Fragmen	blue	barnacle
8.84	Fragmen	brown	barnacle
10.05	Fragmen	brown	barnacle
6.45	Fragmen	blue	barnacle
4.89	Fragmen	blue	barnacle
3.04	Fragmen	blue	barnacle
8.07	Pelet	brown	barnacle
21.23	Fiber	black	barnacle
224.92	Fiber	blue	barnacle
226.41	Fiber	blue	barnacle
12.85	Fragmen	brown	barnacle
5.96	Fragmen	brown	barnacle
12.14	Fragmen	blue	barnacle
13.59	Fragmen	blue	barnacle
11.48	Fragmen	blue	barnacle
13.57	Fragmen	blue	barnacle
11.65	Fragmen	blue	barnacle
15.62	Fragmen	brown	barnacle
15.49	Fiber	blue	barnacle
66.7	Fiber	blue	barnacle
321.41	Fiber	blue	barnacle
6.77	Fragmen	blue	barnacle
7.76	Fragmen	blue	barnacle
9.88	Fragmen	black	barnacle
4.79	Fragmen	blue	barnacle
6.76	Fragmen	blue	barnacle
5.47	Fragmen	blue	barnacle
4.54	Fragmen	blue	barnacle
4.28	Fragmen	blue	barnacle
3.06	Fragmen	blue	barnacle
6.16	Fragmen	blue	barnacle
6.83	Fragmen	blue	barnacle
8.22	Fragmen	blue	barnacle
5.33	Fragmen	blue	barnacle
21.76	Fiber	blue	barnacle
568.79	Fiber	yellow	barnacle
138.09	Fiber	blue	barnacle
11.23	Fragmen	blue	barnacle
14.73	Fragmen	blue	barnacle
10.99	Fragmen	blue	barnacle
13.28	Fragmen	brown	barnacle
16.61	Fragmen	brown	barnacle
10.39	Fragmen	blue	barnacle
5.37	Fragmen	blue	barnacle
13.42	Fragmen	blue	barnacle
12.12	Fragmen	blue	barnacle
4.91	Fragmen	blue	barnacle
9.87	Fragmen	brown	barnacle
141.68	Fiber	blue	barnacle
98.91	Fiber	blue	barnacle
87.42	Fiber	black	barnacle
192.09	Fiber	blue	barnacle
11.65	Fragmen	blue	barnacle
10.11	Fragmen	blue	barnacle
10.63	Fragmen	blue	barnacle
8.91	Fragmen	blue	barnacle
8.34	Fragmen	blue	barnacle
12.4	Fragmen	red	barnacle
6.02	Fragmen	blue	barnacle
4.32	Fragmen	blue	barnacle
6.78	Pelet	brown	barnacle
503.63	Fiber	blue	barnacle
9.58	Fiber	blue	barnacle
8.27	Fragmen	blue	barnacle
17.84	Fragmen	blue	barnacle
6.39	Fragmen	blue	barnacle
14.61	Fragmen	blue	barnacle
7.18	Fragmen	blue	barnacle
6.48	Fragmen	blue	barnacle
5.3	Fragmen	brown	barnacle
312.82	Fiber	black	barnacle
388.06	Fiber	yellow	barnacle
38.98	Fiber	black	barnacle
74.32	Fiber	red	barnacle
58.15	Fiber	blue	barnacle
38.3	Fiber	blue	barnacle
10.31	Fragmen	blue	barnacle
9.73	Fragmen	blue	barnacle
17.96	Fragmen	brown	barnacle
8.18	Fragmen	blue	barnacle
15.31	Fragmen	brown	barnacle
9.14	Fragmen	blue	barnacle
7.08	Fragmen	blue	barnacle
7.71	Fragmen	blue	barnacle
3.98	Fragmen	blue	barnacle
4.13	Fragmen	blue	barnacle
5.5	Fragmen	blue	barnacle
8.35	Pelet	brown	barnacle
301.01	Fiber	black	barnacle
427.82	Fiber	blue	barnacle
106.69	Fiber	black	barnacle
206.55	Fiber	red	barnacle
6.42	Fragmen	blue	barnacle
30.58	Fragmen	blue	barnacle
3.78	Fragmen	blue	barnacle
6.65	Fragmen	blue	barnacle
8.29	Fragmen	blue	barnacle
18.58	Fragmen	black	barnacle
15.21	Pelet	brown	barnacle
195.91	Fiber	black	barnacle
22.1	Fiber	black	barnacle
282.43	Fiber	blue	barnacle
16.78	Fragmen	blue	barnacle
9.96	Fragmen	brown	barnacle
6.49	Fragmen	brown	barnacle
16.21	Fragmen	blue	barnacle
7.59	Fragmen	blue	barnacle
11.38	Fragmen	black	barnacle
9.6	Fragmen	brown	barnacle
5.7	Fragmen	blue	barnacle
7.65	Fragmen	blue	barnacle
10.06	Fragmen	red	barnacle
7.81	Fragmen	blue	barnacle
4.74	Fragmen	blue	barnacle
9.57	Fragmen	blue	barnacle
300.53	Fiber	blue	Sediment
57.04	Fiber	blue	Sediment
12.87	Fiber	blue	Sediment
46.29	Fiber	blue	Sediment
324.97	Fiber	blue	Sediment
94.78	Fiber	blue	Sediment
35.12	Fiber	blue	Sediment
97.96	Fiber	blue	Sediment
175.42	Fiber	blue	Sediment
62.08	Fiber	blue	Sediment
276.45	Fiber	blue	Sediment
83.56	Fiber	blue	Sediment
65.37	Fiber	blue	Sediment
105.51	Fiber	blue	Sediment
156.34	Fiber	black	Sediment
70.83	Fiber	blue	Sediment
197.36	Fiber	blue	Sediment
86.07	Fiber	red	Sediment
29.80	Fragmen	blue	Sediment
33.32	Fragmen	blue	Sediment
13.37	Fragmen	blue	Sediment
17.92	Fragmen	blue	Sediment
137.31	Fragmen	blue	Sediment
60.74	Fragmen	blue	Sediment
196.29	Fiber	blue	Water
112.80	Fiber	blue	Water
49.70	Fiber	red	Water
72.65	Fiber	blue	Water
48.36	Fiber	blue	Water
42.85	Fiber	blue	Water
181.61	Fiber	blue	Water
189.99	Fiber	blue	Water
185.65	Fiber	black	Water
227.71	Fiber	red	Water
24.62	Fragmen	green	Water
19.09	Fragmen	green	Water
30.73	Fragmen	brown	Water
5.45	Fragmen	brown	Water
12.25	Fragmen	brown	Water
15.03	Fragmen	brown	Water
14.77	Fragmen	black	Water

## Sheet: Morphometry
	Morphometry in barnacle
Replication	nomor	length (cm)	width (cm)	weight (g)	Total particles MPs	weight (g)	volume KOH (ml)
1	1	0.7	0.5	0.4	23	0.7	60
	2	0.7	0.5	0.1
	3	0.6	0.5	0.05
	4	0.7	0.4	0.05
	5	0.7	0.6	0.1
		0.68	0.5		4.6	32.8571
2	6	0.8	0.5	0.1	24	0.5	60
	7	0.7	0.5	0.1
	8	0.7	0.5	0.1
	9	0.6	0.4	0.1
	10	0.5	0.4	0.1
		0.66	0.46		4.8	48
3	11	0.5	0.4	0.05	11	0.75	60
	12	0.8	0.6	0.3
	13	0.8	0.6	0.2
	14	0.7	0.4	0.1
	15	0.6	0.4	0.1
		0.68	0.48		2.2	14.6667
4	16	0.7	0.6	0.2	16	0.8	60
	17	0.7	0.5	0.2					In conclusion, the data is homogeneous
	18	0.6	0.4	0.2
	19	0.6	0.4	0.1
	20	0.6	0.4	0.1
		0.64	0.46		3.2	20			Tests of Normality
5	21	0.5	0.4	0.1	14	0.6	60		1=Spesies A		Kolmogorov-Smirnova			Shapiro-Wilk
	22	0.5	0.4	0.1							Statistic	df	Sig.	Statistic	df	Sig.
	23	0.8	0.6	0.2					Barnacle Length	Spesies A	0.141634	10	.200*	0.937013	10	0.520276
	24	0.6	0.5	0.1					*. This is a lower bound of the true significance.
	25	0.6	0.4	0.1					a. Lilliefors Significance Correction
		0.6	0.46		2.8	23.3333
6	26	0.6	0.5	0.05	13	0.31	60
	27	0.5	0.4	0.05
	28	0.6	0.5	0.2
	29	0.3	0.2	0.01
	30	0.6	0.4	0.1
		0.52	0.4		2.6	41.9355
7	31	0.6	0.4	0.1	9	0.6	60
	32	0.6	0.5	0.2
	33	0.5	0.4	0.1
	34	0.5	0.4	0.1
	35	0.6	0.4	0.1
		0.56	0.42		1.8	15
8	36	0.5	0.4	0.1	18	0.5	60
	37	0.8	0.4	0.2
	38	0.5	0.4	0.05
	39	0.4	0.3	0.05
	40	0.5	0.4	0.1
		0.54	0.38		3.6	36
9	41	0.8	0.5	0.2	11	0.45	60
	42	0.6	0.4	0.1
	43	0.5	0.3	0.03
	44	0.4	0.3	0.02
	45	0.6	0.5	0.1
		0.58	0.4		2.2	24.4444
10	46	0.6	0.5	0.1	16	0.5	60
	47	0.8	0.6	0.1
	48	0.6	0.5	0.1
	49	0.6	0.5	0.1
	50	0.4	0.3	0.1
		0.6	0.48		3.2	32

## Sheet: Mps in Barnacle
Mps in Barnacle
Replication	Shape	Number	Color	Size					Replication	fiber	fragmen	pelet	Total
1	Fiber	1.1	blue	63.55					Replication 1	12	11	0	23
		1.2	blue	161.94					Replication 2	7	16	1	24		97
		1.3	blue	82		color			Replication 3	3	8	0	11
		1.4	blue	15.59		blue	108		Replication 4	3	13	0	16
		1.5	blue	21.43		red	0		Replication 5	3	11	0	14
		1.6	blue	58.37		yellow	0		Replication 6	4	8	1	13
		1.7	blue	37.55		black	0		Replication 7	2	7	0	9
		1.8	blue	157.5		brown	20		Replication 8	6	11	1	18
		1.9	red	143.09		total	128		Replication 9	4	6	1	11
		1.10	blue	15.03					Replication 10	3	13	0	16
		1.11	blue	12.27					Total	47	104	4	15.5
		1.12	blue	4.51							Total	155
	Fragmen	1.1	blue	5.14
		1.2	black	10.63
		1.3	blue	5.47
		1.4	blue	2.49						Tests of Normality
		1.5	blue	3.75						1=Barnacle		Kolmogorov-Smirnova			Shapiro-Wilk
		1.6	blue	3.65								Statistic	df	Sig.	Statistic	df	Sig.
		1.7	blue	4.17						Average MPS length	Barnacle	0.184205	10	.200*	0.863682	10	0.0843169
		1.8	black	9.92						*. This is a lower bound of the true significance.
		1.9	blue	3.13						a. Lilliefors Significance Correction
		1.10	brown	17.37
		1.11	black	33.14						Tests of Normality
				37.8996						1=Spesies A. amphitrite		Kolmogorov-Smirnova			Shapiro-Wilk
2	Fiber	2.1	blue	102.86								Statistic	df	Sig.	Statistic	df	Sig.
		2.2	blue	57.93						MPs Results	Spesies A. amphitriite	0.160304	10	.200*	0.928557	10	0.433854
		2.3	blue	20.39						*. This is a lower bound of the true significance.
		2.4	blue	7.85						a. Lilliefors Significance Correction
		2.5	red	76.14
		2.6	black	279.14
		2.7	black	58.88
	Fragmen	2.1	blue	7.25
		2.2	blue	3.42
		2.3	red	27
		2.4	blue	7.77
		2.5	red	6.63
		2.6	brown	18.44
		2.7	black	21.29
		2.8	blue	10.34
		2.9	blue	8.83
		2.10	blue	7.03
		2.11	blue	6.03
		2.12	brown	8.84
		2.13	brown	10.05
		2.14	blue	6.45
		2.15	blue	4.89
		2.16	blue	3.04
	Pelet	2.1	brown	8.07
				32.0233
3	Fiber	3.1	black	21.23
		3.2	blue	224.92
		3.3	blue	226.41
	Fragmen	3.1	brown	12.85
		3.2	brown	5.96
		3.3	blue	12.14
		3.4	blue	13.59
		3.5	blue	11.48
		3.6	blue	13.57
		3.7	blue	11.65
		3.8	brown	15.62
				51.7655
4	Fiber	4.1	blue	15.49
		4.2	blue	66.7
		4.3	blue	321.41
	Fragmen	4.1	blue	6.77
		4.2	blue	7.76
		4.3	black	9.88
		4.4	blue	4.79
		4.5	blue	6.76
		4.6	blue	5.47
		4.7	blue	4.54
		4.8	blue	4.28
		4.9	blue	3.06
		4.10	blue	6.16
		4.11	blue	6.83
		4.12	blue	8.22
		4.13	blue	5.33
			blue	30.2156
5	Fiber	5.1	blue	21.76
		5.2	yellow	568.79
		5.3	blue	138.09
	Fragmen	5.1	blue	11.23
		5.2	blue	14.73
		5.3	blue	10.99
		5.4	brown	13.28
		5.5	brown	16.61
		5.6	blue	10.39
		5.7	blue	5.37
		5.8	blue	13.42
		5.9	blue	12.12
		5.10	blue	4.91
		5.11	brown	9.87
				60.8257
6	Fiber	6.1	blue	141.68
		6.2	blue	98.91
		6.3	black	87.42
		6.4	blue	192.09
	Fragmen	6.1	blue	11.65
		6.2	blue	10.11
		6.3	blue	10.63
		6.4	blue	8.91
		6.5	blue	8.34
		6.6	red	12.4
		6.7	blue	6.02
		6.8	blue	4.32
	Pelet	6.1	brown	6.78
				46.0969
7	Fiber	7.1	blue	503.63
		7.2	blue	9.58
	Fragmen	7.1	blue	8.27
		7.2	blue	17.84
		7.3	blue	6.39
		7.4	blue	14.61
		7.5	blue	7.18
		7.6	blue	6.48
		7.7	brown	5.3
				64.3644
8	Fiber	8.1	black	312.82
		8.2	yellow	388.06
		8.3	black	38.98
		8.4	red	74.32
		8.5	blue	58.15
		8.6	blue	38.3
	Fragmen	8.1	blue	10.31
		8.2	blue	9.73
		8.3	brown	17.96
		8.4	blue	8.18
		8.5	brown	15.31
		8.6	blue	9.14
		8.7	blue	7.08
		8.8	blue	7.71
		8.9	blue	3.98
		8.10	blue	4.13
		8.11	blue	5.5
	Pelet	8.1	brown	8.35
				56.5561
9	Fiber	9.1	black	301.01
		9.2	blue	427.82
		9.3	black	106.69
		9.4	red	206.55
	Fragmen	9.1	blue	6.42
		9.2	blue	30.58
		9.3	blue	3.78
		9.4	blue	6.65
		9.5	blue	8.29
		9.6	black	18.58
	Pelet	9.1	brown	15.21
				102.871
10	Fiber	10.1	black	195.91
		10.2	black	22.1
		10.3	blue	282.43
	Fragmen	10.1	blue	16.78
		10.2	brown	9.96
		10.3	brown	6.49
		10.4	blue	16.21
		10.5	blue	7.59
		10.6	black	11.38
		10.7	brown	9.6
		10.8	blue	5.7
		10.9	blue	7.65
		10.10	red	10.06
		10.11	blue	7.81
		10.12	blue	4.74
		10.13	blue	9.57
				38.9988

## Sheet: Mps in water and sediment
Sediment								Water
Shape	Number	Color	SIze (µm)					Shape	Number	Color	SIze (µm)
Fiber	1.1	blue	300.53					Fiber	1.1	blue	196.29
	1.2	blue	57.04						1.2	blue	112.80
	1.3	blue	12.87						1.3	red	49.70
	1.4	blue	46.29						1.4	blue	72.65
	1.5	blue	324.97						1.5	blue	48.36
	1.6	blue	94.78						1.6	blue	42.85
	1.7	blue	35.12						1.7	blue	181.61
	1.8	blue	97.96						1.8	blue	189.99
	1.9	blue	175.42						1.9	black	185.65
	1.10	blue	62.08						1.10	red	227.71
	1.11	blue	276.45					Fragmen	1.1	green	24.62
	1.12	blue	83.56						1.2	green	19.09
	1.13	blue	65.37						1.3	brown	30.73
	1.14	blue	105.51						1.4	brown	5.45
	1.15	black	156.34						1.5	brown	12.25
	1.16	blue	70.83						1.6	brown	15.03
	1.17	blue	197.36						1.7	black	14.77
	1.18	red	86.07
Fragmen	1.1	blue	29.80							blue	7
	1.2	blue	33.32							black	2
	1.3	blue	13.37							red	2
	1.4	blue	17.92							green	2
	1.5	blue	137.31							brown	4
	1.6	blue	60.74						total		17
	blue	22		fiber	18					fiber	10
	black	1		fragmen	6					fragmen	7
	red	1
total		24

## Sheet: Pearson Correlation
No. Teritip	Length Barnacle(x1)	Length Mps(y)
1	0.68	37.9			Correlations
2	0.66	32.02					Length Barnacle	Length MPS
3	0.68	51.77			Length Barnacle	Pearson Correlation	1	-0.411034
4	0.64	30.22				Sig. (2-tailed)		0.237992
5	0.6	60.83				N	10	10
6	0.52	46.1			Length MPs	Pearson Correlation	-0.411034	1
7	0.56	64.36				Sig. (2-tailed)	0.237992
8	0.54	56.56				N	10	10
9	0.58	102.87
10	0.6	39

## Sheet: FTIR
Sample	Polymer	Amount
Barnacle Replication 1	Cellophane	1
	hydroxyethyl cellulose	1
	poly(1 3-oxathiolane)	1
Barnacle Replication 2	Cellophane	1
	poly(1 3-oxathiolane)	1			Cellophane	5	0.357143
Barnacle Replication 4	Cellophane	1			poly(1 3-oxathiolane)	4	0.285714
	poly(1 3-oxathiolane)	1			Pullulan P2000	1	0.0714286
Barnacle Replication 8	hexa methylol melamine	1			Pullulan P800	1	0.0714286
Barnacle Replication 10	Cellophane	1			hexa methylol melamine	1	0.0714286
	poly(1 3-oxathiolane)	1			hydroxyethyl cellulose	1	0.0714286
Water	Cellophane	1			Polyester with kaolin filler	1	0.0714286
	Pullulan P2000	1
	Pullulan P800	1				14
	Polyester with kaolin filler	1
Sediment
		14
		Barnacle Replication 1														Barnacle Replication 2
		Barnacle Replication 4														Barnacle Replication 8
		Barnacle Replication 10														Water Sample
		Sediment Sample
